# Supplementary material
Source: Royal Society of Chemistry journal article supplement (doi:10.1039/d6nr01524g)
Supplement: d6nr01524g1.pdf [file d6nr01524g1.pdf]

## Supporting Information

### Angstrom-Scale-Distance Dependent Synergy in Cluster via Atom-by-Atom Regulation for Enhanced Photocatalytic CO<sub>2</sub> Reduction

Haijiao Yin,<sup>a#</sup> Yuting Luo,<sup>b#</sup> Rui Lu,<sup>a#</sup> En Guo,<sup>a</sup> Yuanxin Du,<sup>a\*</sup> Pu Wang,<sup>b\*</sup> Manzhou Zhu<sup>a\*</sup>

<sup>a</sup> Department of Materials Science and Engineering, Centre for Atomic Engineering of Advanced Materials, Key Laboratory of Structure and Functional Regulation of Hybrid Materials of Ministry of Education, Key Laboratory of Functional Inorganic Material Chemistry of Anhui Province, Anhui University, Hefei 230601, China

<sup>b</sup> Department of Chemistry, Key Laboratory of Environmentally Friendly Chemistry and Applications of Ministry of Education, Xiangtan University, Xiangtan, Hunan 411105, China

# These authors contributed equally to this work.

\* Corresponding author. E-mail: duyuanxin@ahu.edu.cn, 90wangpu@xtu.edu.cn, zmz@ahu.edu.cn

#### 1.1 Experimental section

*Materials:* palladium chloride (PdCl<sub>2</sub>, 99%), hydrochloric acid (AR), palladium acetate (Pd(CH<sub>3</sub>COO)<sub>2</sub>, 99%), palladium nitrate dihydrate (Pd(NO<sub>3</sub>)<sub>2</sub>·2H<sub>2</sub>O, 99.99%), triphenylphosphine (PPh<sub>3</sub>, 99%), palladium(II)bis(triphenylphosphine) dichloride (Pd(PPh<sub>3</sub>)<sub>2</sub>Cl<sub>2</sub>, 99%), sodium borohydride (NaBH<sub>4</sub>, 99.99%), tetraphenylphosphonium bromide (PPh<sub>4</sub>Br, 98%), titanium dioxide (TiO<sub>2</sub>, 99%), methylene chloride (CH<sub>2</sub>Cl<sub>2</sub>, HPLC grade), triethylamine (AR), phenylethyl mercaptan (99%), tetrahydrofuran (THF, HPLC grade), acetic ether (CH<sub>3</sub>COOC<sub>2</sub>H<sub>5</sub>, HPLC grade), methanol (CH<sub>3</sub>OH, HPLC grade), acetonitrile (CH<sub>3</sub>CN, HPLC grade), n-hexane (Hex, HPLC grade), 2,4-dimethylthiophenol (2,4-DMBT, 99%), and ethanol were bought from Sigma–Aldrich or Aladdin Reagent. Ultrapure deionized water (18.2 MΩ cm<sup>-1</sup>) was used in all experiments. All of the above chemicals were used as received without further purification. All glassware was thoroughly cleaned with aqua regia (HCl : HNO<sub>3</sub> = 3 : 1 vol%), rinsed with copious pure water, and then dried in an oven prior to use.

*Synthesis of TiO<sub>2</sub>*: 200 mg purchased TiO<sub>2</sub> powder and 30 mg NaBH<sub>4</sub> were evenly mixed in a mortar, transferred to a porcelain boat and calcined at 350 °C for 30 min. After calcination, the material was cleaned with water and ethanol three times.

*Synthesis of Pd<sub>2</sub>*: Pd<sub>2</sub> was prepared according to a previously reported method with some modifications. Pd(CH<sub>3</sub>COO)<sub>2</sub> (50.0 mg, 0.223 mmol) and PPh<sub>3</sub> (100.0 mg, 0.381 mmol) were dissolved in 10 mL THF and the mixture was stirred continuously in the flask for 5 min. Then, 2, 4-DMBTB (120.0 mg, 0.868 mmol) was added. After two minutes, a cold aqueous solution of sodium borohydride (130.0 mg, 3.44 mmol) was added. After 5 minutes, the reaction completed, the black solution was washed with methanol. The Pd<sub>2</sub> was isolated from the crude product by preparative thin layer chromatography (PTLC).

*Synthesis of Pd<sub>3</sub>*: Pd<sub>3</sub> was prepared according to a previously reported method with some modifications. 1.42 g PdCl<sub>2</sub> was added to 10 mL hydrochloric acid, then 0.6 mL (0.48 mmol) of the above solution was added into 10 mL THF. Triphenylphosphine (0.313 g, 1.2 mmol) was added, and the mixture was stirred intensely for 8 minutes. Next, 5 mL of an ethanolic NaBH<sub>4</sub> (1.6 mg/mL) solution was added and the solution was stirred vigorously for 1 h. The undissolved (excessive) triphenylphosphine was removed by centrifugation. The remaining solution was dried by vacuum evaporation using a rotary distillation machine. The product was washed with water and methylene chloride, then evaporated again until dry. The product Pd<sub>3</sub> was obtained by adding excess n-hexane, followed by precipitation and centrifugation.

*Synthesis of Pd<sub>5</sub>*: Pd<sub>5</sub> was prepared according to a previously reported method with some modifications. Pd(NO<sub>3</sub>)<sub>2</sub>·2H<sub>2</sub>O (135 mg, 0.51 mmol), phenylethyl mercaptan (150 μL, 1.1 mmol), and triethylamine (150 μL, 1.08 mmol) were dissolved in 6 mL acetonitrile, and the mixture was stirred rapidly. The reaction was stopped after 5 h. The yellow precipitate obtained was washed with excess deionized water and ethanol. The mixed precipitate was extracted with methylene chloride, centrifuged to remove the undissolved product, and then separated by PTLC using a mixture of methylene chloride and petroleum ether (1/2 v : v) to obtain Pd<sub>5</sub>.

*Synthesis of Pd<sub>x</sub>-TiO<sub>2</sub>*: 4 mg Pd<sub>x</sub> was dissolved in dichloromethane, and 100 mg TiO<sub>2</sub> dispersed in ethanol was added into the flask. The mixture was homogenized by stirred thoroughly, and the dried

by rotary evaporation apparatus to obtain the Pd<sub>x</sub>-TiO<sub>2</sub>.

*Synthesis of Pd NP-TiO<sub>2</sub>*: 6.7 mg of PdCl<sub>2</sub> was weighed, dissolved in deionized water, and a small amount of dilute hydrochloric acid was added. After PdCl<sub>2</sub> was completely dissolved, 100 mg of TiO<sub>2</sub> was added. The mixture was stirred and ultrasonicated to ensure uniform dispersion. Then, a NaBH<sub>4</sub> solution was slowly added under stirring. The precipitate was collected by centrifugation, washed with deionized water and ethanol, and dried in a vacuum oven to obtain 4 wt% Pd NP-TiO<sub>2</sub>.

## **1.2 Material characterization**

TEM image was recorded using a transmission electron microscope (JEM ARM-200F, JEOL). XRD pattern was collected on diffractometer (Smart Lab 9 kW, Japan) with Cu K $\alpha$  radiation ( $\lambda = 0.15418$  nm). XPS spectrum was performed on Esca Lab 250Xi X-ray Photoelectron Spectrometer. UV-vis diffuse reflectance spectroscopy (DRS) was conducted on Hitachi U-3900 UV-visible spectrophotometer with barium sulfate as a reference. CO<sub>2</sub> adsorption was measured on automatic microporous gas adsorption analyzer ASAP 2020. Photoluminescence (PL) emission spectrum and lifetime were obtained by using fluorescence spectrophotometer (Hitachi, F-4600) and ultra-fast time-resolved fluorescence spectrometer (Horiba Fluoro max plus), respectively. Thermo Fisher Scientific TSQ8000EVO gas chromatography-mass spectrometry (GC-MS) was used to detect <sup>13</sup>C and <sup>12</sup>C labeled products. Photoelectrochemical tests were conducted on an electrochemical workstation (CHI 760E, Chen Hua Instrument, China). The glassy carbon (indium-doped tin oxide for photocurrent test), Pt foil, and Ag/AgCl (saturated KCl) were acted as working, counter, and reference electrode, respectively. Na<sub>2</sub>SO<sub>4</sub> (0.5 M, pH = 7) was as electrolyte.

## **1.3 In situ attenuated total reflectance Fourier transform infrared spectroscopy (ATR-FTIR) measurement**

In situ ATR-FTIR spectra were obtained by using a temperature-controlled Perkin Elmer instrument. The catalyst was evenly applied to the silicon single crystal and placed on the optical attachment. High purity CO<sub>2</sub> was injected into the reaction tank and bubbled for 30 minutes. Turned on the xenon lamp and collected signals at ten-minute intervals. The machine was equipped with a liquid nitrogen-cooled MCT detector and PIKE Vee MAX optical attachment.

## **1.4 The calculation of apparent quantum yield (AQY)**

Considering the photocatalytic CO<sub>2</sub> reduction process in this system involves the following two types of reactions:

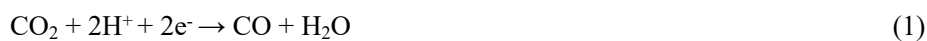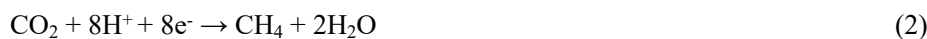

The apparent quantum yield (AQY) can be calculated by the following equation:

$$\text{AQY (\%)} = \frac{N_e}{N_p} \times 100\% = \frac{(M_{\text{CO}} \times 2 + M_{\text{CH}_4} \times 8) \times N_A \times h \times c}{P \times S \times t \times \lambda} \times 100\% \quad (3)$$

$N_e$  and  $N_p$  represent the number of electrons required for the reaction product and the number of incident photons, respectively.  $M_{\text{CO}}$  and  $M_{\text{CH}_4}$  represent the Molar amount of generated CO and CH<sub>4</sub>, respectively.  $N_A$ ,  $P$ ,  $S$ ,  $t$ ,  $\lambda$ ,  $h$ ,  $c$  are the Avogadro constant ( $6.02 \times 10^{23} \text{ mol}^{-1}$ ), the light intensity (100 mW/cm<sup>2</sup>), the irradiated area (9.07 cm<sup>2</sup>), the exposure time, the wavelength of the incident light (420 nm), the Planck's constant ( $6.62 \times 10^{-34} \text{ J}\cdot\text{s}$ ), the speed of light ( $3 \times 10^8 \text{ m}\cdot\text{s}^{-1}$ ), respectively.

### 1.5 The calculation of yield

$$\text{Yield} = \frac{n_{\text{product}}}{m_{\text{cat}} \times t} \quad (4)$$

$n_{\text{product}}$ : the amount of product in moles ( $\mu\text{mol}$ ).

$m_{\text{cat}}$ : mass of the catalyst (g).

$t$ : reaction time (h).

### 1.6 Computational method

All geometry optimizations for each catalytic intermediate were performed using density functional theory (DFT) as implemented in the DMol<sup>3</sup> program in the Materials Studio package.<sup>[1,2]</sup> Due to computational cost and time factors, the real ligands of all clusters are simplified to methyl. The generalized gradient approximation (GGA) with the Perdew-Burkr-Ernzerhof (PBE) functional,<sup>[3,4]</sup> the double- $\zeta$  numerical basis set with polarization d-function (DND) and semi-core pseudopotential (DSPP) approximation were adopted.<sup>[5]</sup> The Tkatchenko-Scheffler (TS) method was used for the dispersion correction.<sup>[6]</sup> The real-space global cutoff radius is set to be 4.5 angstrom. The

convergence criterion of the geometrical optimization was set to be  $1.0 \times 10^{-5}$  Hartree for energy change,  $4.0 \times 10^{-3}$  Hartree/Å for the gradient, and  $5.0 \times 10^{-3}$  Å for the atom displacement, respectively. The analysis of chemical bond formation and properties was conducted using the Atoms in Molecules (AIM) theory via the Multiwfn software.<sup>[7]</sup> The input files were generated by Gaussian 16.<sup>[8]</sup> For single-point energy calculations, the PBE functional was employed, with the 6-31g\*\* basis set for C, H, Cl, and P atoms, and the LANL2dz basis set for Pd atoms.

This paper constructs a three-layer TiO<sub>2</sub> substrate model to simulate, considering the adsorption of various Pd nanoclusters on the TiO<sub>2</sub> surface. Atoms in the bottom two layers were fixed at their lattice positions, and all other atoms including adsorbates were allowed to relax. A vacuum layer about 20 Å thickness was added to the slab to ensure that there were no interactions between the slab and the periodic structures perpendicular to the surface.

The Gibbs free energy of CO adsorption ( $\Delta G_{\text{ad}}$ ) was calculated according to  $\Delta G_{\text{ad}} = G_{\text{CO}^*} - G^* - G_{\text{CO}}$ , where  $G_{\text{CO}^*}$ ,  $G^*$ , and  $G_{\text{CO}}$  represent the total Gibbs free energies of the catalyst slab with adsorbed CO, the corresponding catalyst slab, and the free CO molecule, respectively. A positive  $\Delta G_{\text{ad}}$  indicates an endothermic adsorption process, whereas a negative  $\Delta G_{\text{ad}}$  corresponds to an exothermic process. The calculated  $\Delta G_{\text{ad}}$  values are summarized in **Table S5**.

The reaction free energies of the photocatalytic steps were calculated using the computational hydrogen electrode proposed by Nørskov et al, where the chemical potential of proton-electron pair ( $\text{H}^+ + \text{e}^-$ ) is equal to a half of the chemical potential of the gas phase H<sub>2</sub>.<sup>[9]</sup>

The reaction pathways of the CO<sub>2</sub> reduction reaction (CO<sub>2</sub>RR,  $\text{CO}_2 + 2\text{H}^+ + 2\text{e}^- \rightarrow \text{CO} + \text{H}_2\text{O}$ ) can be written as:

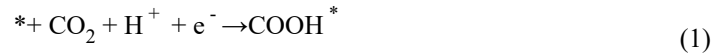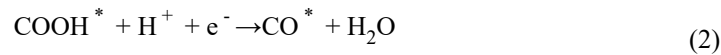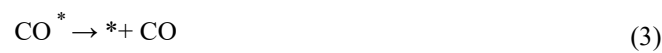

where \* denotes the active site of the catalyst. The Gibbs free energy change ( $\Delta G$ ) for the elementary reaction was calculated by following equations:

$$\Delta G_1 = G(\text{COOH}^*) - G(\text{H}^*) - G(\text{CO}_2) - \frac{1}{2}G(\text{H}_2) \quad (4)$$

$$\Delta G_2 = G(\text{CO}^*) + G(\text{H}_2\text{O}) - G(\text{COOH}^*) - \frac{1}{2}G(\text{H}_2) \quad (5)$$

$$\Delta G_3 = G(\text{H}^*) + G(\text{CO}) - G(\text{CO}^*) \quad (6)$$

The species Gibbs free energy was determined by  $\Delta G = \Delta E + \Delta \text{ZPE} - T\Delta S$ ,<sup>[10]</sup> where  $\Delta E$  is the change of reaction energy directly obtained from the DFT total energies,  $\Delta \text{ZPE}$  is the change of zero-point energy,  $T$  is the system temperature of 298.15 K, and  $\Delta S$  is the change in entropy.<sup>[11,12]</sup> Zero-point energies and entropies were computed from the vibrational frequencies. For the adsorption of intermediates  $\text{COOH}^*$ ,  $\text{CO}^*$  and  $\text{H}^*$ , vibrational frequency evaluation for surface adsorbates considered the  $3N$  degrees of freedom of the adsorbates. The  $\Delta \text{ZPE} - T\Delta S$  for adsorbed species and gas phase species are presented in **Table S6**.

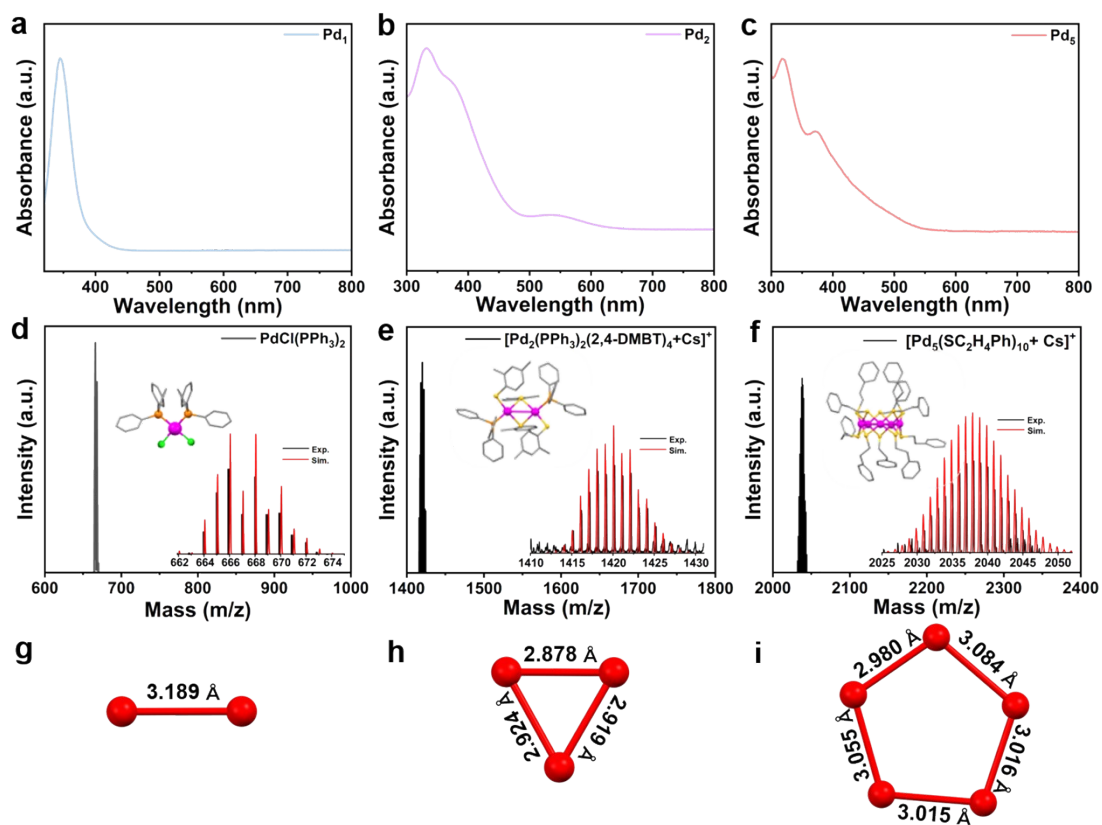

**Figure S1.** (a-c) UV-vis absorbance spectra of Pd<sub>x</sub> (x = 1, 2 and 5). (d-f) Positive-ion mode ESI-MS spectra and corresponding crystal structure of Pd<sub>x</sub> (x = 1, 2 and 5) Color codes: Pd = magenta, P = orange, S = yellow, Cl = green, C = gray. (g-i) The Pd-Pd bond length of Pd<sub>x</sub> (x = 1, 2 and 5).

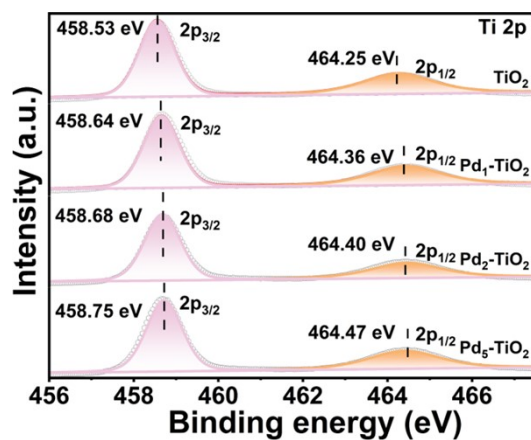

**Figure S2.** Ti 2p XPS spectra of TiO<sub>2</sub> and Pd<sub>x</sub>-TiO<sub>2</sub> (x = 1, 2 and 5).

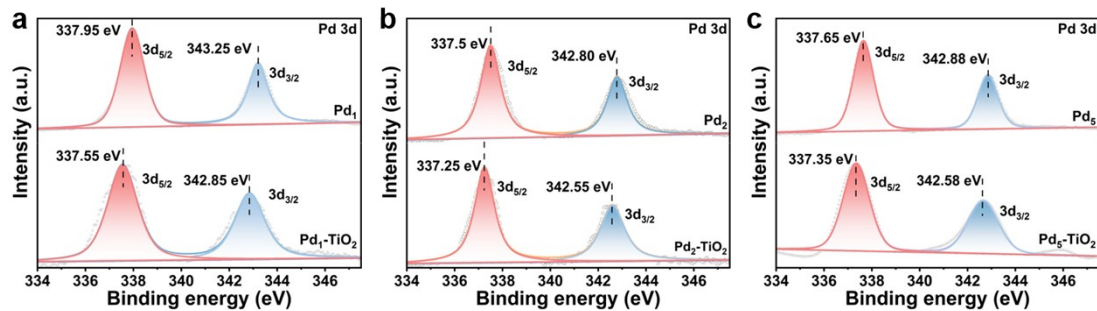

**Figure S3.** (a-c) Pd 3d XPS spectra of Pd<sub>x</sub> and Pd<sub>x</sub>-TiO<sub>2</sub> (x = 1, 2 and 5).

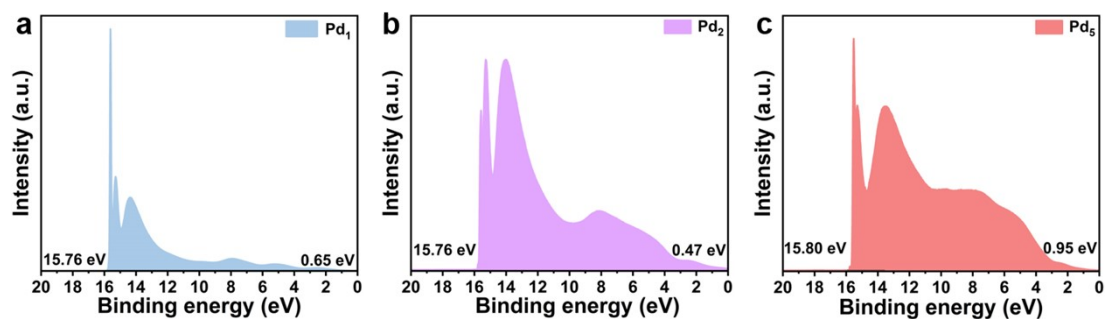

**Figure S4.** UPS spectra of (a) Pd<sub>1</sub>, (b) Pd<sub>2</sub> and (c) Pd<sub>5</sub>.

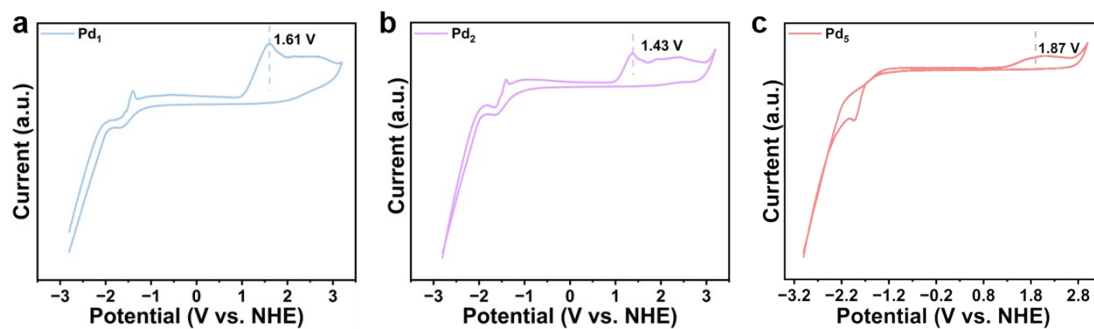

**Figure S5.** CV curves of (a) Pd<sub>1</sub>, (b) Pd<sub>2</sub> and (c) Pd<sub>5</sub>.

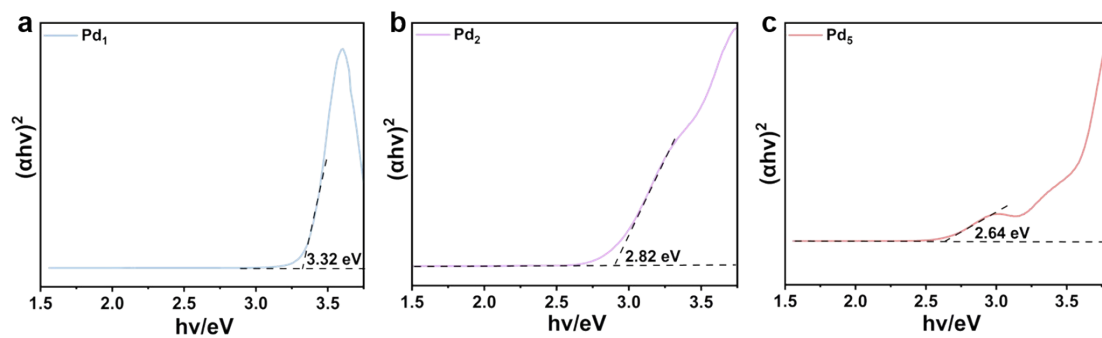

**Figure S6.** Tauc plots of (a) Pd<sub>1</sub>, (b) Pd<sub>2</sub> and (c) Pd<sub>5</sub>.

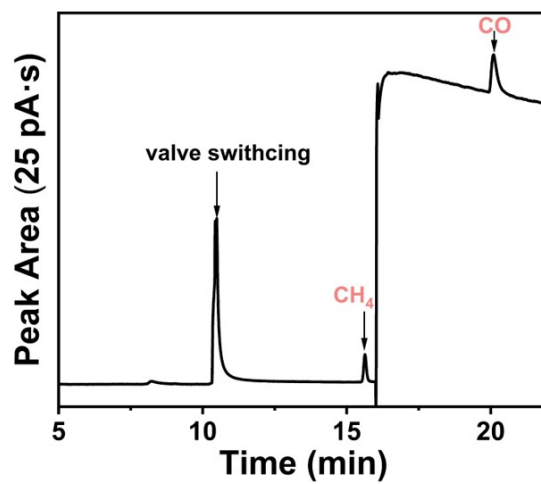

**Figure S7.** The on-line GC spectrum of gas product detected on FID detector.

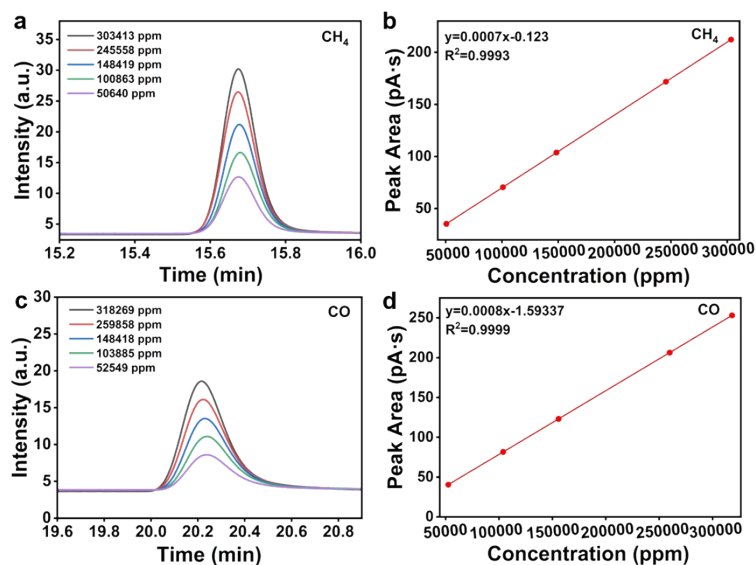

**Figure S8.** (a) GC spectra of different CH<sub>4</sub> content. (b) The corresponding concentration-peak area calibration curve of CH<sub>4</sub>. (c) GC spectra of different CO content. (d) The corresponding concentration-peak area calibration curve of CO.

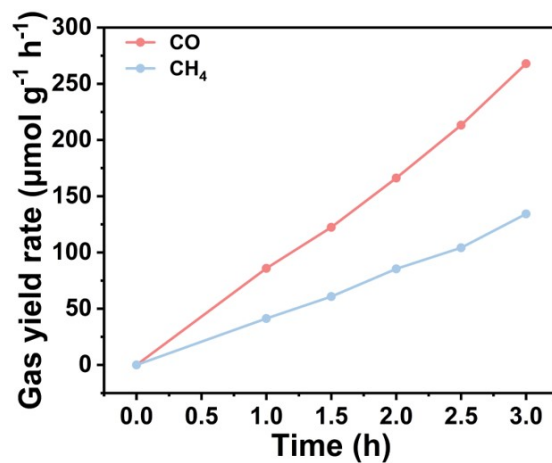

**Figure S9.** Time-dependent photocatalytic CO and CH<sub>4</sub> production of Pd<sub>3</sub>-TiO<sub>2</sub>.

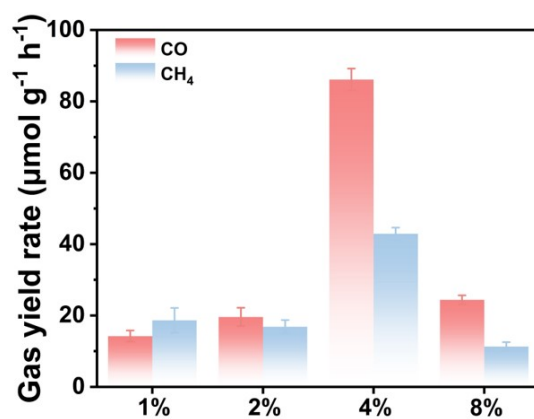

**Figure S10.** Photocatalytic CO and CH<sub>4</sub> production rate of Pd<sub>3</sub>-TiO<sub>2</sub> with different contents of Pd<sub>3</sub>.

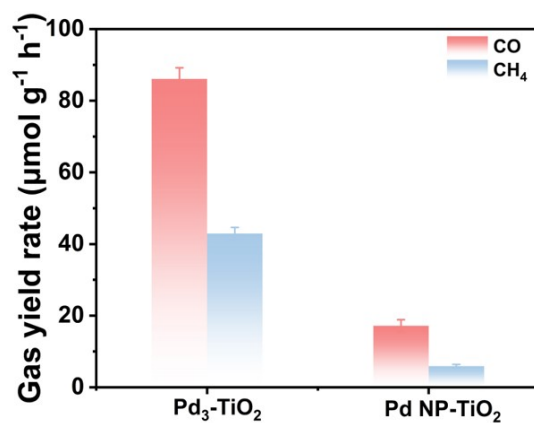

**Figure S11.** The comparison of photocatalytic CO and CH<sub>4</sub> production rate of Pd<sub>3</sub>-TiO<sub>2</sub> and Pd NP-TiO<sub>2</sub>.

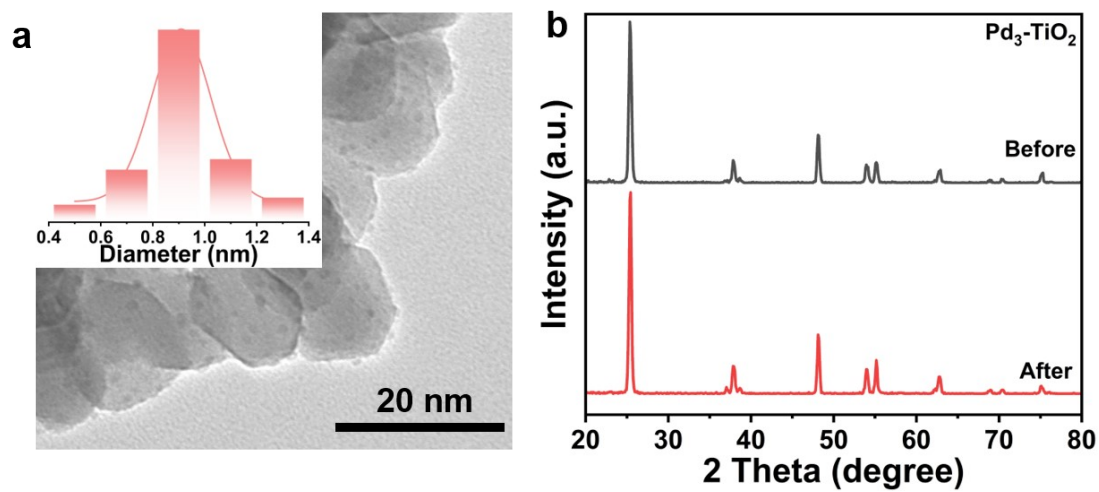

**Figure S12.** (a) TEM image and (b) XRD pattern of Pd<sub>3</sub>-TiO<sub>2</sub> after reaction.

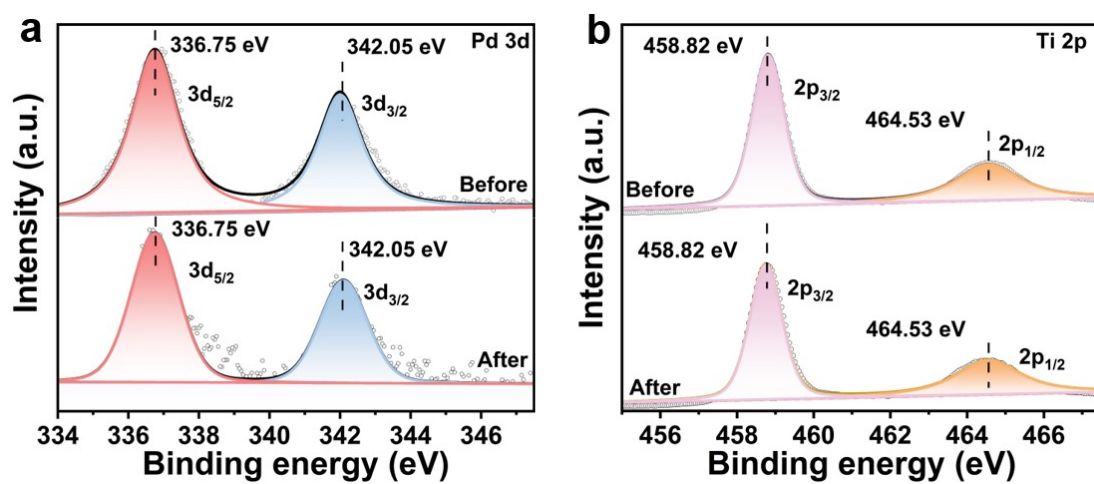

**Figure S13.** (a) Pd 3d and (b) Ti 2p XPS spectra of Pd<sub>3</sub>-TiO<sub>2</sub> before and after photocatalytic CO<sub>2</sub> reduction.

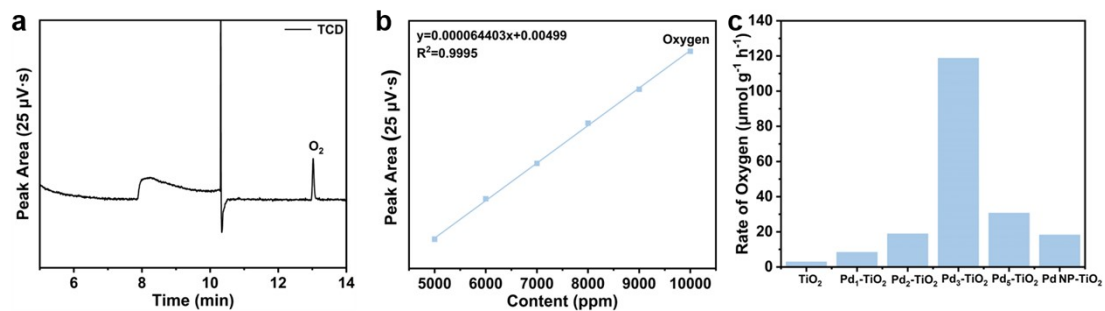

**Figure S14.** (a) The GC spectrum of O<sub>2</sub> detected on TCD and (b) the corresponding fitting calibration curve. (c) The O<sub>2</sub> production rate of different samples.

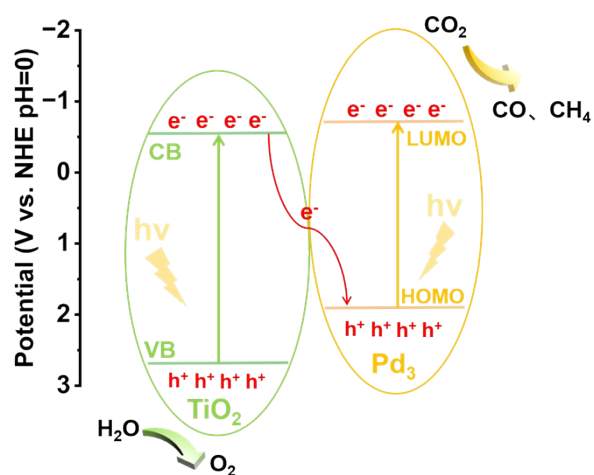

**Figure S15.** Schematic illustration of Z-scheme charge transfer pathway in Pd<sub>3</sub>-TiO<sub>2</sub> heterojunction during photocatalytic CO<sub>2</sub>RR.

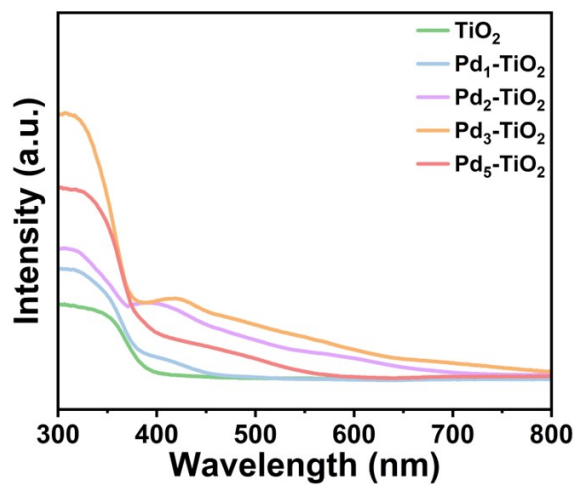

**Figure S16.** UV-vis diffuse reflection spectroscopy of different samples.

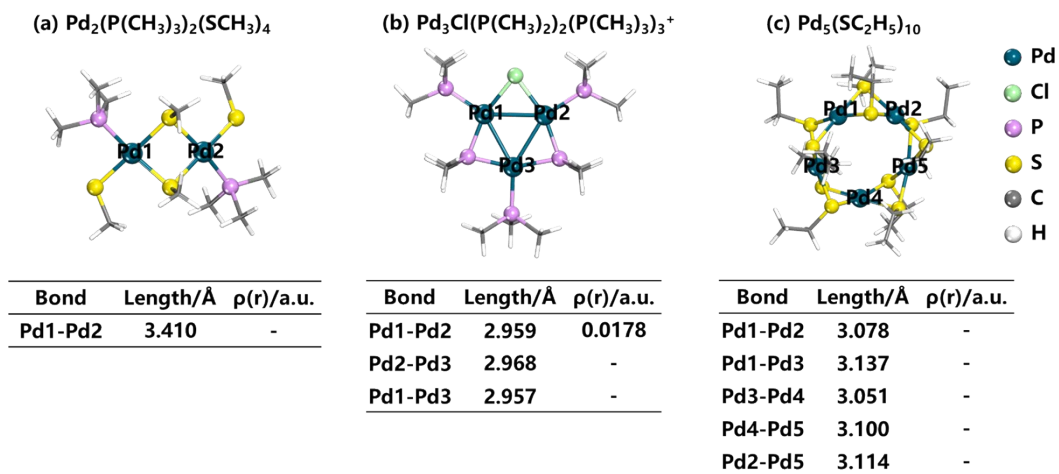

**Figure S17.** Pd-Pd bond lengths and electron densities at bond critical points (BCPs) in Pd clusters.

“-” indicates a weak interaction with no available electron density data.

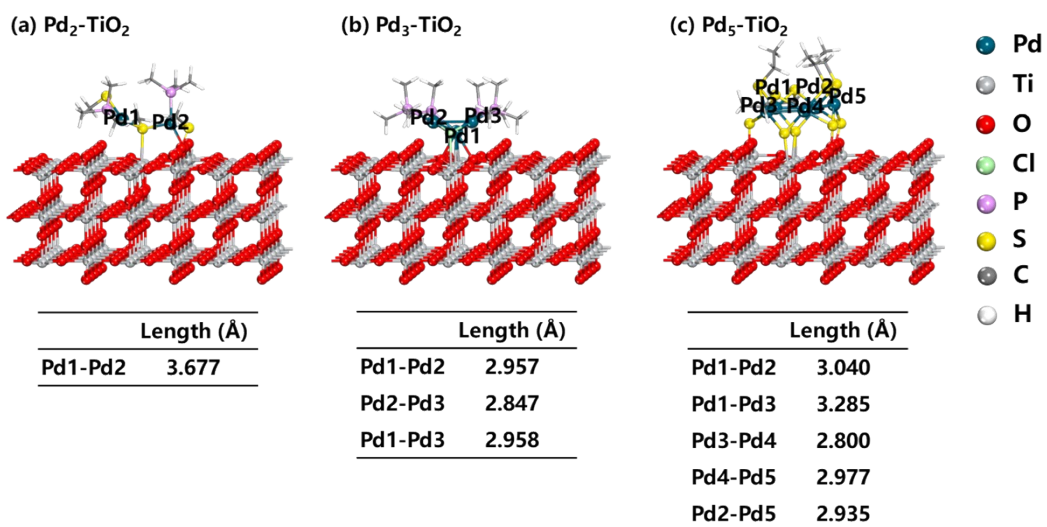

**Figure S18.** Pd-Pd bond lengths in Pd<sub>x</sub>-TiO<sub>2</sub> (x = 2, 3, and 5).

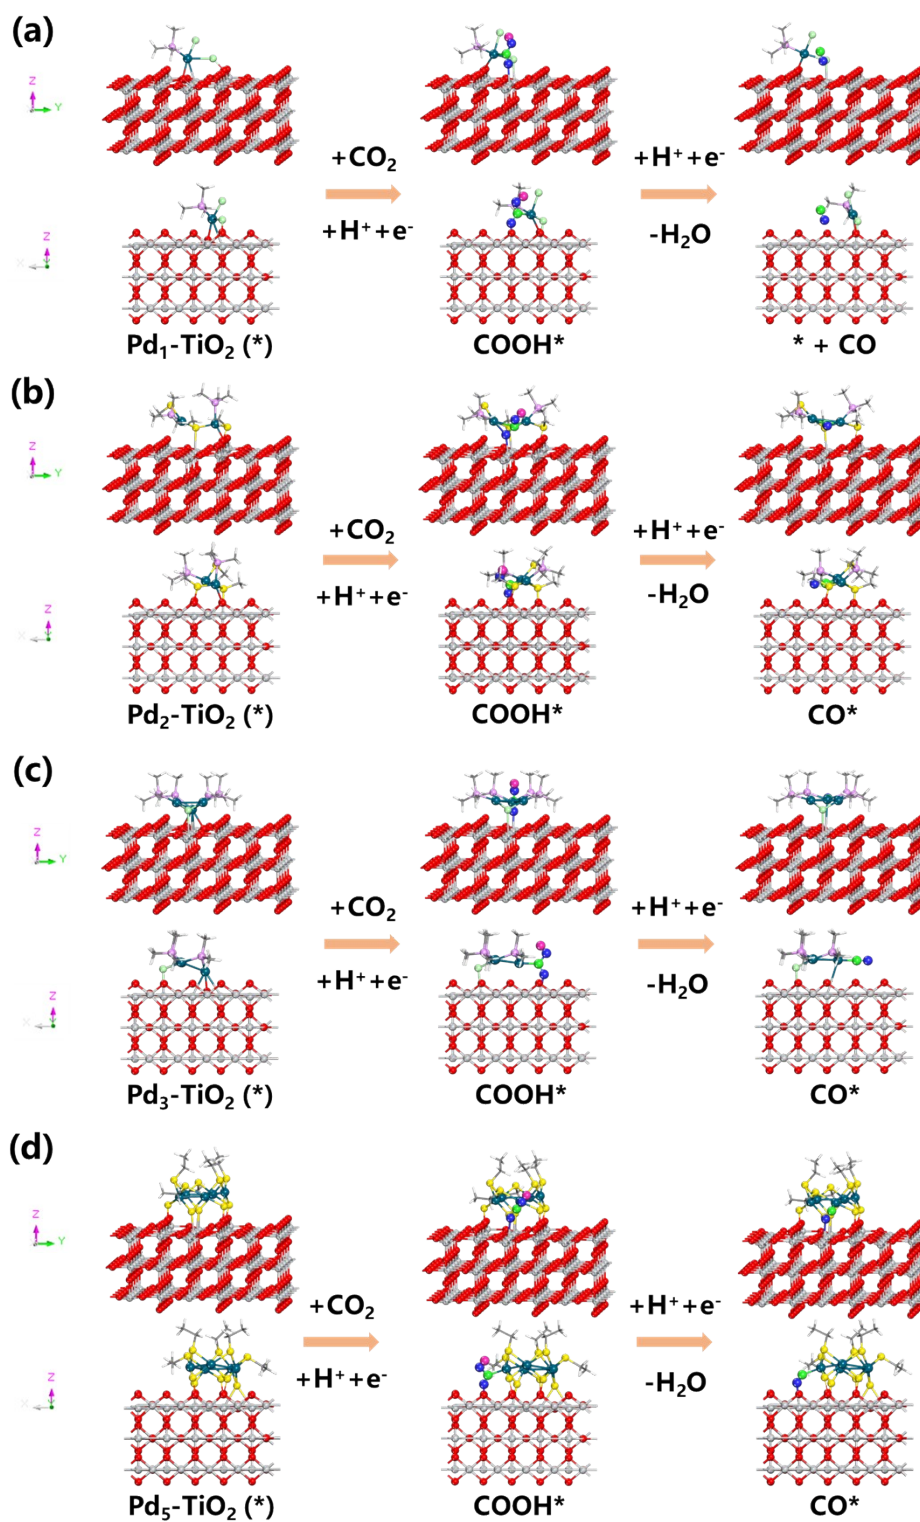

**Figure S19.** Structural schematic diagram of reactants, intermediates, and products along the photocatalytic CO<sub>2</sub>RR reaction pathway on (a) Pd<sub>1</sub>-TiO<sub>2</sub>, (b) Pd<sub>2</sub>-TiO<sub>2</sub>, (c) Pd<sub>3</sub>-TiO<sub>2</sub>, and (d) Pd<sub>5</sub>-TiO<sub>2</sub>.

**Table S1.** The CO and CH<sub>4</sub> production rate of different samples.

| Photocatalysts                    | CO ( $\mu\text{mol g}^{-1} \text{h}^{-1}$ ) | CH <sub>4</sub> ( $\mu\text{mol g}^{-1} \text{h}^{-1}$ ) |
|-----------------------------------|---------------------------------------------|----------------------------------------------------------|
| TiO <sub>2</sub>                  | 4.26                                        | 0.82                                                     |
| Pd <sub>1</sub> -TiO <sub>2</sub> | 5.21                                        | 3.59                                                     |
| Pd <sub>2</sub> -TiO <sub>2</sub> | 19.76                                       | 5.98                                                     |
| Pd <sub>3</sub> -TiO <sub>2</sub> | 86.09                                       | 42.94                                                    |
| Pd <sub>5</sub> -TiO <sub>2</sub> | 29.13                                       | 9.98                                                     |
| Pd NP-TiO <sub>2</sub>            | 17.20                                       | 5.94                                                     |

**Table S2.** The performance comparison of photocatalytic CO<sub>2</sub> reduction to CO/CH<sub>4</sub> in various samples.

| Catalyst                                             | Light source                                | Condition                                | Products and yields/ $\mu\text{mol gcat}^{-1} \text{h}^{-1}$ | AQY/%           | References                                 |
|------------------------------------------------------|---------------------------------------------|------------------------------------------|--------------------------------------------------------------|-----------------|--------------------------------------------|
| Pd-HPP-TiO <sub>2</sub>                              | 300 W Xe lamp                               | CO <sub>2</sub> and water                | CO 34<br>CH <sub>4</sub> 48                                  | /               | Nat. Commun. 2022, 13, 1400                |
| Cu-TiO <sub>2</sub>                                  | 300 W Xe lamp                               | CO <sub>2</sub> and water                | CO 15.27                                                     | /               | Angew. Chem. Int. Ed. 2022, 61, e202207600 |
| Pd/PdSA/TiO <sub>2</sub>                             | 300 W Xe lamp                               | CO <sub>2</sub> and water                | CH <sub>4</sub> 37.28                                        | /               | Adv. Funct. Mater. 2025, e22529            |
| Mn-Co <sub>3</sub> O <sub>4</sub>                    | 300 W Xe lamp                               | CO <sub>2</sub> and water                | CH <sub>4</sub> 23.4                                         | /               | J. Am. Chem. Soc. 2024, 146, 15338         |
| Cs <sub>2</sub> AgBiBr <sub>6</sub>                  | AM 1.5                                      | CO <sub>2</sub> and water                | CO 14.1<br>CH <sub>4</sub> 9.6                               | /               | Adv. Sci. 2024, 11, 2309526                |
| PW <sub>9</sub> /g-C <sub>3</sub> N <sub>4</sub>     | 300 W Xe lamp                               | CO <sub>2</sub> and water                | CH <sub>4</sub> 40.8                                         | 3.01%<br>380 nm | Angew. Chem. Int. Ed. 2025, 64, e202413594 |
| Pd <sub>TP</sub> /Pd <sub>SA</sub> -CN               | 300 W Xe lamp                               | CO <sub>2</sub> and water                | CH <sub>4</sub> 46.5                                         | /               | Adv. Power Mater. 2024, 3, 100170          |
| Cu <sub>1</sub> -TiO <sub>2</sub> /BiVO <sub>4</sub> | 300 W Xe lamp                               | CO <sub>2</sub> and water                | CO 17.33                                                     | /               | J. Am. Chem. Soc. 2024, 146, 9163          |
| BTOAu                                                | 300 W Xe lamp                               | CO <sub>2</sub> and water                | CO 34.15                                                     | /               | Nat. Commun. 2024, 15, 305                 |
| Al-Au-0.5                                            | 300 W Xe lamp                               | CO <sub>2</sub> and water                | CO 31.7                                                      | /               | Appl. Catal. B. Environ. 2024, 345, 123703 |
| 44BP-TiO <sub>2</sub>                                | 300 W Xe lamp                               | CO <sub>2</sub> and water                | CH <sub>4</sub> 10.76                                        | /               | J. Am. Chem. Soc. 2023, 145, 5769          |
| Ni <sub>1</sub> /P-CN                                | 300 W Xe lamp                               | CO <sub>2</sub> , MeCN, BIH, TFE         | CO 71                                                        | 0.32%<br>400 nm | Carbon Energy. 2024, 6, 533                |
| Cu <sub>3</sub> -BPY-COF(Ru/CO)-2                    | visible light<br>$\lambda > 420 \text{ nm}$ | CO <sub>2</sub> , MeCN, H <sub>2</sub> O | CH <sub>4</sub> 31.5                                         | /               | Angew. Chem. Int. Ed. 2025, 64, e202505546 |
| Cu SAs /TiO <sub>2</sub>                             | 300 W Xe lamp                               | CO <sub>2</sub> and water                | CO 65.8                                                      | 2%<br>420 nm    | ACS Catal. 2022, 12, 14096                 |
| C-ZnO-500                                            | 300 W Xe lamp                               | CO <sub>2</sub> and water                | CO 30.09                                                     | /               | Appl. Catal. B. Environ. 2026, 383, 126025 |
| Pd <sub>1</sub> +NPs/C <sub>3</sub> N <sub>4</sub>   | 300 W Xe lamp                               | CO <sub>2</sub> and water                | CH <sub>4</sub> 20.3                                         | 2.93%<br>385 nm | Adv. Mater. 2022, 34, 2200057              |
| PAN-332-DCM                                          | 300 W Xe lamp                               | CO <sub>2</sub> and water                | CO 74.7                                                      | 0.13%<br>808 nm | Angew. Chem. Int. Ed. 2025, 64, e202508924 |
| Cu NCs/TiO <sub>2</sub>                              | 300 W Xe lamp                               | CO <sub>2</sub> and water                | CH <sub>4</sub> 40.3                                         | /               | Chem. Eng. J. 2022, 445, 136718            |
| TBHO                                                 | 365 nm LED                                  | CO <sub>2</sub> and water                | CO 29.1                                                      | /               | Adv. Funct. Mater. 2024, 34, 2311663       |

|                                   |               |                           |                                   |                 |                                               |
|-----------------------------------|---------------|---------------------------|-----------------------------------|-----------------|-----------------------------------------------|
| TiZrNbTaZnO <sub>10</sub>         | 400W Hg lamp  | CO <sub>2</sub> and water | CO 25.3<br>CH <sub>4</sub> 9.99   | /               | Appl. Catal. B. Environ.<br>2025, 371, 125259 |
| Pd <sub>3</sub> -TiO <sub>2</sub> | 300 W Xe lamp | CO <sub>2</sub> and water | CO 86.09<br>CH <sub>4</sub> 42.94 | 4.49%<br>420 nm | This work                                     |

**Table S3.** The actual O<sub>2</sub> production rate and theoretical production rate of different samples.

| Photocatalysts                    | Oxygen ( $\mu\text{mol g}^{-1} \text{h}^{-1}$ ) | Theoretical Oxygen ( $\mu\text{mol g}^{-1} \text{h}^{-1}$ ) |
|-----------------------------------|-------------------------------------------------|-------------------------------------------------------------|
| TiO <sub>2</sub>                  | 2.88                                            | 3.77                                                        |
| Pd <sub>1</sub> -TiO <sub>2</sub> | 8.36                                            | 9.785                                                       |
| Pd <sub>2</sub> -TiO <sub>2</sub> | 18.86                                           | 21.84                                                       |
| Pd <sub>3</sub> -TiO <sub>2</sub> | 118.68                                          | 128.925                                                     |
| Pd <sub>5</sub> -TiO <sub>2</sub> | 30.65                                           | 34.525                                                      |
| Pd NP-TiO <sub>2</sub>            | 18.23                                           | 20.48                                                       |

**Table S4.** Charge distribution of Pd<sub>x</sub> and Pd<sub>x</sub>-TiO<sub>2</sub> (x = 1, 2, 3 and 5).

| Charge (e) |     | Pd <sub>x</sub> | Pd <sub>x</sub> -TiO <sub>2</sub> | Δ (e)  |
|------------|-----|-----------------|-----------------------------------|--------|
| x = 1      | Pd1 | 0.054           | -0.105                            | -0.159 |
|            | Pd1 | -0.177          | -0.359                            | -0.182 |
| x = 2      | Pd2 | -0.227          | -0.300                            | -0.073 |
|            | sum | -0.404          | -0.659                            | -0.255 |
| x = 3      | Pd1 | -0.238          | -0.295                            | -0.057 |
|            | Pd2 | -0.278          | -0.425                            | -0.147 |
|            | Pd3 | -0.264          | -0.404                            | -0.140 |
|            | sum | -0.780          | -1.124                            | -0.344 |
| x = 5      | Pd1 | -0.151          | -0.231                            | -0.080 |
|            | Pd2 | -0.162          | -0.241                            | -0.079 |
|            | Pd3 | -0.191          | -0.185                            | -0.006 |
|            | Pd4 | -0.185          | -0.246                            | -0.061 |
|            | Pd5 | -0.194          | -0.240                            | -0.046 |
|            | sum | -0.883          | -1.143                            | -0.260 |

**Table S5.** Calculated Gibbs free energies for CO adsorption on Pd<sub>x</sub>-TiO<sub>2</sub> (x = 1, 2, 3 and 5).

|                                   | $\Delta G_{\text{ad}}$ (eV) |
|-----------------------------------|-----------------------------|
| Pd <sub>1</sub> -TiO <sub>2</sub> | -                           |
| Pd <sub>2</sub> -TiO <sub>2</sub> | 0.08                        |
| Pd <sub>3</sub> -TiO <sub>2</sub> | -0.53                       |
| Pd <sub>5</sub> -TiO <sub>2</sub> | 0.38                        |

**Table S6.** The ZPE and TS for adsorbed species and gas phase species.

| species                                 | ZPE-TS (eV) |
|-----------------------------------------|-------------|
| H <sub>2</sub>                          | -0.22       |
| CO                                      | -0.81       |
| CO <sub>2</sub>                         | 0.09        |
| H <sub>2</sub> O                        | 0.12        |
| Pd <sub>1</sub> -TiO <sub>2</sub> -COOH | 0.45        |
| Pd <sub>2</sub> -TiO <sub>2</sub> -COOH | 0.51        |
| Pd <sub>2</sub> -TiO <sub>2</sub> -CO   | 0.16        |
| Pd <sub>3</sub> -TiO <sub>2</sub> -COOH | 0.49        |
| Pd <sub>3</sub> -TiO <sub>2</sub> -CO   | 0.07        |
| Pd <sub>5</sub> -TiO <sub>2</sub> -COOH | 0.49        |
| Pd <sub>5</sub> -TiO <sub>2</sub> -CO   | 0.11        |

## References

- [1] Botti, S. Applications of Time-Dependent Density Functional Theory. *Phys. Scr.* 2004, T109, 54–60.
- [2] Adamo C, Jacquemin D. The calculations of excited-state properties with Time-Dependent Density Functional Theory. *Chemical Society Reviews*, 2013, 42(3): 845-856.
- [3] Kresse, G.; Joubert, D. From ultrasoft pseudopotentials to the projector augmented-wave method. *Phys. Rev. B: Condens. Matter Mater. Phys.* 1999, 59, 1758–1775.
- [4] Perdew, J. P.; Burke, K.; Ernzerhof, M. Generalized gradient approximation made simple. *Phys. Rev. Lett.* 1996, 77, 3865–3868.
- [5] Hamann D R, Schlüter M, Chiang C. Norm-conserving pseudopotentials. *Physical Review Letters*, 1979, 43(20): 1494.
- [6] Tkatchenko A, Scheffler M. Accurate molecular van der Waals interactions from ground-state electron density and free-atom reference data. *Physical review letters*, 2009, 102(7): 073005.
- [7] Lu T., Chen F. Multiwfn: A multifunctional wavefunction analyzer[J]. *Journal of Computational Chemistry*, 2012, 33(5): 580-592.
- [8] Frisch M. J., Trucks G. W., Schlegel H. B., et al. Gaussian 16, gaussian[J]. Inc., Wallingford CT, 2016, 2016.
- [9] Nørskov J K, Rossmeisl J, Logadottir A, et al. Origin of the overpotential for oxygen reduction at a fuel-cell cathode. *The Journal of Physical Chemistry B*, 2004, 108(46): 17886-17892.
- [10] Nitopi S, Bertheussen E, Scott S B, et al. Progress and perspectives of electrochemical CO<sub>2</sub> reduction on copper in aqueous electrolyte. *Chemical reviews*, 2019, 119(12): 7610-7672.
- [11] Simón L, Goodman J M. How reliable are DFT transition structures? Comparison of GGA, hybrid-meta-GGA and meta-GGA functionals. *Organic & biomolecular chemistry*, 2011, 9(3): 689-700.
- [12] Zeng Z, Chang K C, Kubal J, et al. Stabilization of ultrathin (hydroxy) oxide films on transition metal substrates for electrochemical energy conversion. *Nature Energy*, 2017, 2(6): 1-9.
